# Type 2 Diabetes and the Risk of Parkinson's Disease

GANG HU, MD, PHD<sup>1,2</sup>  
PEKKA JOUSILAHTI, MD, PHD<sup>1,3</sup>  
SIAMAK BIDEI, MD<sup>1,2</sup>

RIITTA ANTIKAINEN, MD, PHD<sup>4</sup>  
JAAKKO TUOMILEHTO, MD, PHD<sup>1,2,5</sup>

**OBJECTIVE** — To evaluate whether type 2 diabetes at baseline is a risk factor for Parkinson's disease.

**RESEARCH DESIGN AND METHODS** — We prospectively followed 51,552 Finnish men and women 25–74 years of age without a history of Parkinson's disease at baseline. History of diabetes and other study parameters were determined at baseline using standardized measurements. Ascertainment of the Parkinson's disease status was based on the nationwide Social Insurance Institution's drug register data. Hazard ratios of incident Parkinson's disease associated with the history of type 2 diabetes were estimated.

**RESULTS** — During a mean follow-up period of 18.0 years, 324 men and 309 women developed incident Parkinson's disease. Age- and study year-adjusted hazard ratios of incident Parkinson's disease among subjects with type 2 diabetes, compared with those without it, were 1.80 (95% CI 1.03–3.15) in men, 1.93 (1.05–3.53) in women, and 1.85 (1.23–2.80) in men and women combined (adjusted also for sex). Further adjustment for BMI, systolic blood pressure, total cholesterol, education, leisure-time physical activity, smoking, alcohol drinking, and coffee and tea consumption affected the results only slightly. The multivariate adjusted association between type 2 diabetes and the risk of Parkinson's disease was also confirmed in stratified subgroup analysis.

**CONCLUSIONS** — These data suggest that type 2 diabetes is associated with an increased risk of Parkinson's disease. Surveillance bias might account for higher rates in diabetes. The mechanism behind this association between diabetes and Parkinson's disease is not known.

*Diabetes Care* 30:842–847, 2007

Type 2 diabetes is one of the fastest growing public health problems worldwide (1), and it is associated with multiple complications. Epidemiological studies have indicated that patients with type 2 diabetes present an excess risk of coronary heart disease compared with individuals without diabetes (2,3). Evidence from prospective epidemiological studies has identified type 2 diabetes as an independent risk factor for multiple hyperglycemia-induced complications virtually in all organs, including

neurodegenerative diseases such as diabetic neuropathy (4), stroke (5–8), dementia (9–11), and Alzheimer's disease (9–11). However, little is known about the association between diabetes and the risk of Parkinson's disease. Only a few cross-sectional studies and two case-control studies have examined the prevalence of diabetes among patients with Parkinson's disease (12–15), and no prospective epidemiological studies have thus far addressed this association. Recently, animal and in vitro studies have

shown that insulin dysregulation and changes in insulin action have been concerned in the pathophysiology and clinical symptoms of Parkinson's disease (16). The aim of this study was to examine whether type 2 diabetes at baseline is a risk factor for Parkinson's disease in a large population-based prospective cohort of Finnish men and women.

## RESEARCH DESIGN AND METHODS

Six independent cross-sectional population surveys were carried out in five geographic areas of Finland in 1972, 1977, 1982, 1987, 1992, and 1997 (17). In 1972 and 1977, a randomly selected sample making up 6.6% of the population born between 1913 and 1947 was drawn. Since 1982, the sample was stratified by area, sex, and 10-year age-group according to the World Health Organization MONICA (MONItoring trends and determinants of Cardiovascular disease) protocol (18). The subjects included in the six surveys were 25–64 years of age, and the 1997 survey also included subjects aged 65–74 years. Subjects who participated in more than one survey were included only in the first survey cohort. The total sample size of the six surveys was 53,166. The participation rate varied by year from 74 to 88% (17). After excluding 123 subjects because of prevalent Parkinson's disease at baseline, 112 subjects because of prevalent type 1 diabetes at baseline or during follow-up, and 1,379 subjects because of incomplete data on any variables required, the present analyses comprise 25,168 men and 26,384 women. The participants gave informed consent (verbal 1972–1992 and signed 1997). These surveys were conducted according to the ethical rules of the National Public Health Institute, and the investigations were performed in accordance with the Declaration of Helsinki.

## Assessment of type 2 diabetes at baseline

Assessment of the history of type 2 diabetes was based on self-reporting and on the data of two nationwide registers. The National Hospital Discharge Register data included hospital discharge diagnoses since 1968. Data on diabetes medication were ascertained from the national Social In-

From the <sup>1</sup>Department of Health Promotion and Chronic Diseases Prevention, National Public Health Institute, Helsinki, Finland; the <sup>2</sup>Department of Public Health, University of Helsinki, Helsinki, Finland; the <sup>3</sup>Tampere School of Public Health, University of Tampere, Tampere, Finland; the <sup>4</sup>Oulu City Hospital and Department of Internal Medicine, University of Oulu, Oulu, Finland; and the <sup>5</sup>South Ostrobothnia Central Hospital, Seinäjoki, Finland.

Address correspondence and reprint requests to Gang Hu, MD, PhD, Department of Health Promotion and Chronic Diseases Prevention, National Public Health Institute, Mannerheimintie 166, FIN-00300 Helsinki, Finland. E-mail: hu.gang@ktl.fi.

Received for publication 27 September 2006 and accepted in revised form 17 January 2007.

Published ahead of print at <http://care.diabetesjournals.org> on 24 January 2007. DOI: 10.2337/dc06-2011.

A table elsewhere in this issue shows conventional and Système International (SI) units and conversion factors for many substances.

© 2007 by the American Diabetes Association.

The costs of publication of this article were defrayed in part by the payment of page charges. This article must therefore be hereby marked "advertisement" in accordance with 18 U.S.C. Section 1734 solely to indicate this fact.

Insurance Institution's register on special reimbursement for antidiabetic drugs from 1964. Antidiabetic drugs prescribed by a physician are free of charge in Finland and are subject to approval of a physician of the Institution who reviews each case history. The physician confirms the diagnosis of diabetes, applying the World Health Organization criteria: one or more classic symptoms plus a fasting plasma glucose level  $\geq 7.8$  mmol/l ( $\geq 7.0$  mmol/l from 1998) or the oral glucose tolerance test  $\geq 11.1$  mmol/l; at least one raised plasma glucose concentration on a fasting plasma glucose level  $\geq 7.8$  mmol/l ( $\geq 7.0$  mmol/l from 1998) or the oral glucose tolerance test  $\geq 11.1$  mmol/l in the absence of symptoms; or treatment with a hypoglycemic drug (oral antidiabetic agents or insulin) (19,20). All patients receiving free medication were entered into a register maintained by the Social Insurance Institution. Subjects who reported having diabetes on the questionnaire, or who had a hospital discharge with a diagnosis of diabetes, or the approval for free-of-charge medication for diabetes before the baseline survey, were classified as having the history of diabetes at baseline.

### Diagnosis of Parkinson's disease

Ascertainment of the Parkinson's disease status was based on the national Social Insurance Institution's register on special reimbursement for Parkinson's disease drugs during 1964 through 31 December 2002. Similarly to diabetic patients, all patients diagnosed with Parkinson's disease are entitled for free-of-charge drugs. According to the criteria set by the Institution, the diagnosis is based on medical history, clinical examination (tremor, bradykinesia, stiffness, etc.), and other relevant diagnostic methods. The diagnosis needs to be done by a consultant (usually a specialist in neurology). Intention tremor, essential tremor, or tremor caused by neuroleptic drugs do not qualify for special reimbursement according to the criteria. A detailed written statement from the physician in charge of the treatment verifying the clinical course and the diagnostic facts is needed to obtain the right to this special reimbursement. The statement is submitted to the Institution and reviewed by the Institution's specialist. Thus, the patient is included in the register only if the diagnosis is agreed on independently by two specialist physicians. It is possible that some mild cases of Parkinson's disease have not been qualified for the special reimbursement of

drugs. All patients receiving free-of-charge medication are entered into a register maintained by the Social Insurance Institution. The national Social Insurance Institution's register data were linked to the risk factor data using the unique identification numbers assigned to every resident of Finland. Follow-up of each cohort member continued until the date of the diagnosis of Parkinson's disease, death, or 31 December 2002. This diagnosed method has been used in several studies in Finland (21).

### Covariates

A self-administered questionnaire was sent to the participants to be completed at home. The questionnaire included questions on medical history, socioeconomic factors, physical activity, smoking habits, and alcohol, coffee, and tea consumption. Education level, measured as the total number of school years, was divided into birth cohort-specific tertiles. A detailed description of the questions about leisure-time physical activity has been presented elsewhere (22–29). Self-reported leisure-time physical activity was classified into three categories: low, moderate, or high. Based on the questionnaire data, the participants were classified as never, ex-, or current smokers. Current smokers were further categorized according to the amount of cigarettes smoked daily (1–9, 10–19, or  $\geq 20$  cigarettes per day). Coffee consumption was categorized into five categories: none, 1–2 cups, 3–4 cups, 5–6 cups, and  $\geq 7$  cups per day (29,30). Tea consumption was categorized into three categories: none, 1–2 cups, and  $\geq 3$  cups per day because only a few people drank tea. Since questions on alcohol consumption were different between the first two surveys (1972 and 1977) and the later surveys, alcohol consumption was categorized into two categories: yes and no.

At the study site, nurses specially trained for survey methodology measured height, weight, and blood pressure using the standardized protocol according to the World Health Organization MONICA project (18). Blood pressure was measured with a standard sphygmomanometer from the right arm of the participant, who was seated for 5 min before the measurement. Height was measured without shoes, and weight was measured with light clothing. BMI was calculated as weight in kilograms divided by the square of the height in meters. After blood pressure measurement, a venous blood spec-

imen was drawn. Serum total cholesterol concentration was determined in the same laboratory for all surveys; the Lieberman Burchard method was used in 1972 and 1977 and an enzymatic method (CHOD-PAP; Boehringer Mannheim, Mannheim, Germany) since 1982. Because the enzymatic method gave 2.4% lower values than the Lieberman Burchard method, 1972 and 1977 values were corrected by this percentage.

### Statistical analysis

Sex-specific differences in risk factors based on the history of type 2 diabetes were tested using ANOVA or logistic regression after adjustment for age and study year. The association between history of type 2 diabetes and the risk of Parkinson's disease was analyzed using Cox proportional hazards models. All analyses were adjusted for age, study year, BMI, systolic blood pressure, total cholesterol, education, leisure-time physical activity, smoking, alcohol drinking, and coffee and tea drinking. Because the interactions between sex and the history of type 2 diabetes on the risk of Parkinson's disease were not statistically significant, data for men and women were combined in some analyses. To avoid the potential bias due to early diagnosis of Parkinson's disease or early mortality with a potential subclinical disease, additional analyses were carried out excluding the subjects who were diagnosed with Parkinson's disease or those who died from any cause during the first 5 years of follow-up. Finally, to assess the potential effect of secondary Parkinsonism or vascular Parkinsonism, additional sensitivity analyses were conducted after excluding subjects who had stroke or coronary heart disease or who used neuroleptic drugs either at baseline or during the follow-up. Statistical significance was considered to be  $P < 0.05$ . All statistical analyses were performed with SPSS for Windows 14.0 (SPSS, Chicago, IL).

**RESULTS** — At baseline, 591 men and 507 women were identified as having a history of type 2 diabetes. General characteristics of the study population are presented in Table 1. Men and women with a history of type 2 diabetes were older, their BMI and baseline systolic blood pressure were higher, and they had lower levels of serum total cholesterol and were less often alcohol drinkers, less often smokers, and more physically inactive than individuals without diabetes.

Table 1—Baseline characteristics according to history of type 2 diabetes

|                                        | Men         |             |        | Women       |             |        |
|----------------------------------------|-------------|-------------|--------|-------------|-------------|--------|
|                                        | No diabetes | Diabetes    | P      | No diabetes | Diabetes    | P      |
| n                                      | 24,577      | 591         |        | 25,877      | 507         |        |
| Age (years)                            | 44.4 ± 11.5 | 53.3 ± 10.6 | <0.001 | 44.5 ± 11.3 | 52.9 ± 11.0 | <0.001 |
| BMI (kg/m <sup>2</sup> )               | 26.3 ± 3.7  | 27.6 ± 4.4  | <0.001 | 26.0 ± 4.7  | 28.4 ± 6.0  | <0.001 |
| Systolic blood pressure (mmHg)         | 143 ± 19    | 148 ± 23    | <0.001 | 139 ± 23    | 145 ± 25    | <0.001 |
| Diastolic blood pressure (mmHg)        | 88 ± 12     | 88 ± 14     | 0.641  | 84 ± 12     | 85 ± 13     | 0.014  |
| Serum total cholesterol (mmol/l)       | 6.2 ± 1.3   | 6.0 ± 1.4   | <0.001 | 6.1 ± 1.3   | 6.0 ± 1.4   | 0.014  |
| Education (years)                      | 9.1 ± 3.9   | 9.1 ± 4.0   | 0.947  | 9.5 ± 3.9   | 8.9 ± 3.8   | <0.001 |
| Coffee consumption (cups/day)          | 5.3 ± 3.2   | 5.1 ± 3.1   | 0.171  | 4.6 ± 2.5   | 4.5 ± 2.4   | 0.134  |
| Tea consumption (cups/day)             | 0.8 ± 1.4   | 0.7 ± 1.4   | 0.309  | 0.8 ± 1.2   | 0.7 ± 1.2   | 0.163  |
| Alcohol drinker (%)                    | 64.9        | 56.2        | <0.001 | 35.2        | 22.7        | <0.001 |
| Low leisure-time physical activity (%) | 28.9        | 36.2        | <0.001 | 38.2        | 47.9        | <0.001 |
| Current smoker (%)                     | 42.5        | 34.7        | <0.001 | 17.2        | 13.6        | 0.034  |

Data are means ± SD unless otherwise indicated and are adjusted for age and study year.

During a mean follow-up period of 18.0 years, 324 men and 309 women developed incident Parkinson's disease. The average ages at the time of diagnosis were 64.3 years in men and 65.8 years in women. Age- and study year-adjusted hazard ratios of incident Parkinson's disease in individuals with type 2 diabetes, compared with people without it, were 1.80 (95% CI 1.03–3.15) in men, 1.93 (1.05–3.53) in women, and 1.85 (1.23–2.80) in men and women combined (adjusted also for sex) (Table 2). Further adjustment for BMI, systolic blood pressure, total cholesterol, education, leisure-time physical activity, smoking, alcohol drinking, and coffee and tea consumption affected the results only slightly.

After exclusion of participants who

were diagnosed with Parkinson's disease during the first 5 years of follow-up or who died during this period ( $n = 1,341$ ), sex- and multivariate-adjusted hazard ratios of Parkinson's disease in people with type 2 diabetes, compared with people without it, was 1.88 (95% CI 1.19–2.99). After exclusion of participants who were diagnosed with stroke at baseline and during follow-up ( $n = 3,049$ ), sex- and multivariate-adjusted type 2 diabetes-associated hazard ratio of Parkinson's disease was 2.00 (95% CI 1.29–3.11). After further exclusion of participants who were diagnosed with coronary heart disease at baseline ( $n = 1,150$ ), sex- and multivariate-adjusted type 2 diabetes-associated hazard ratio of Parkinson's disease was 1.94 (95% CI 1.21–3.11).

Moreover, after exclusion of participants who used neuroleptic medications at baseline or during follow-up ( $n = 1,817$ ), sex- and multivariate-adjusted type 2 diabetes-associated hazard ratio of Parkinson's disease was 1.92 (95% CI 1.21–3.06).

Table 3 shows the association of type 2 diabetes with the risk of Parkinson's disease in different subgroups. Sex- and multivariate-adjusted direct association between the history of type 2 diabetes and the risk of Parkinson's disease was present in smokers. The association was strongest in diabetic patients aged 25–44 years and statistically significant also in those aged 45–54 years at baseline. There were no significant interactions between age and diabetes on risk of Parkinson's disease.

Table 2—Hazard ratio of Parkinson's disease according to history of type 2 diabetes

|                         | Numbers of participants | Numbers of cases | Person-years | Hazard ratio (95% CI)             |                          |                          |                          |
|-------------------------|-------------------------|------------------|--------------|-----------------------------------|--------------------------|--------------------------|--------------------------|
|                         |                         |                  |              | Adjustment for age and study year | Multivariate adjustment* | Multivariate adjustment† | Multivariate adjustment‡ |
| Men                     |                         |                  |              |                                   |                          |                          |                          |
| No prior diabetes       | 24,577                  | 311              | 428,052      | 1.00                              | 1.00                     | 1.00                     | 1.00                     |
| Prior diabetes          | 591                     | 13               | 7125         | 1.80 (1.03–3.15)                  | 1.78 (1.01–3.12)         | 1.79 (1.02–3.13)         | 1.78 (1.01–3.12)         |
| Women                   |                         |                  |              |                                   |                          |                          |                          |
| No prior diabetes       | 25,877                  | 298              | 485,518      | 1.00                              | 1.00                     | 1.00                     | 1.00                     |
| Prior diabetes          | 507                     | 11               | 7042         | 1.93 (1.05–3.53)                  | 1.93 (1.05–3.54)         | 1.90 (1.04–3.49)         | 1.91 (1.04–3.52)         |
| Men and women combined§ |                         |                  |              |                                   |                          |                          |                          |
| No prior diabetes       | 50,454                  | 609              | 913,570      | 1.00                              | 1.00                     | 1.00                     | 1.00                     |
| Prior diabetes          | 1098                    | 24               | 14,167       | 1.85 (1.23–2.80)                  | 1.85 (1.22–2.79)         | 1.83 (1.21–2.76)         | 1.83 (1.21–2.76)         |

\*Adjusted for age, study year, BMI (<23, 23–24.9, 25–26.9, 27–29.9, and ≥30 kg/m<sup>2</sup>), systolic blood pressure, cholesterol, education, and leisure-time physical activity (low, moderate, and high). †Adjusted for age, study year, cigarette smoking (never, past, and current smoking of 1–9, 10–19, or ≥20 cigarettes/day), coffee consumption (none, 1–2, 3–4, 5–6, and ≥7 cups/day), tea consumption (none, 1–2, and ≥3 cups/day), and alcohol consumption (yes and no). ‡Adjusted for age, study year, BMI (<23, 23–24.9, 25–26.9, 27–29.9, and ≥30 kg/m<sup>2</sup>), systolic blood pressure, cholesterol, education, leisure-time physical activity (low, moderate, and high), cigarette smoking (never, past, and current smoking of 1–9, 10–19, or ≥20 cigarettes/day), coffee consumption (none, 1–2, 3–4, 5–6, and ≥7 cups/day), tea consumption (none, 1–2, and ≥3 cups/day), and alcohol consumption (yes and no). §Also adjusted for sex.

Table 3—Hazard ratio of Parkinson's disease according to history of type 2 diabetes among various subpopulations

|                         | Numbers of participants |          | Numbers of cases |          | Person-years |          | Hazard ratio (95% CI) |                  |
|-------------------------|-------------------------|----------|------------------|----------|--------------|----------|-----------------------|------------------|
|                         | No diabetes             | Diabetes | No diabetes      | Diabetes | No diabetes  | Diabetes | No diabetes           | Diabetes         |
| Age at baseline (years) |                         |          |                  |          |              |          |                       |                  |
| 25–44                   | 25,391                  | 217      | 162              | 4        | 508,691      | 3,853    | 1.00                  | 3.45 (1.27–9.37) |
| 45–54                   | 13,355                  | 267      | 223              | 9        | 242,241      | 3,896    | 1.00                  | 2.88 (1.47–5.66) |
| 55–74                   | 11,708                  | 614      | 224              | 11       | 162,637      | 6,418    | 1.00                  | 1.26 (0.68–2.32) |
| Smoking                 |                         |          |                  |          |              |          |                       |                  |
| Never                   | 27,466                  | 574      | 373              | 13       | 519,144      | 7,583    | 1.00                  | 1.70 (0.98–2.98) |
| Ever or current         | 22,988                  | 524      | 236              | 11       | 394,425      | 6,584    | 1.00                  | 1.94 (1.05–5.59) |

Adjusted for age, sex, study year, BMI (<23, 23–24.9, 25–26.9, 27–29.9, and  $\geq 30$  kg/m<sup>2</sup>), systolic blood pressure, cholesterol, education, leisure-time physical activity (low, moderate, and high), cigarette smoking (never, past, and current smoking of 1–9, 10–19, or  $\geq 20$  cigarettes/day; except in smoking status analysis), coffee consumption (none, 1–2, 3–4, 5–6, and  $\geq 7$  cups/day), tea consumption (none, 1–2, and  $\geq 3$  cups/day), and alcohol consumption (yes and no).

**CONCLUSIONS**— In this large prospective study, type 2 diabetes was associated with an increased risk of Parkinson's disease among Finnish men and women. This association was independent of the known modifying factors such as smoking status, coffee and alcohol consumption, and body weight. The multivariate-adjusted association was present in both subjects aged 25–44 and 45–54 years and smokers.

The present study is, to our knowledge, the first large prospective study to find that type 2 diabetes is a risk factor of Parkinson's disease. In one longitudinal study examining the association of diabetes at baseline with the progression of Parkinsonian-like signs, the investigators observed that diabetes was associated with worsening rigidity and gait but was not associated with an increased risk of bradykinesia or tremor (31). The presence of stroke did not substantially affect the association of diabetes with rigidity but reduced the association of diabetes with gait (31). Until now, only a few cross-sectional studies and two case-control studies have examined the prevalence of diabetes among patients with Parkinson's disease. It has been reported in one review by Sandyk (12) that over half of patients with Parkinson's disease have abnormal glucose tolerance. In a national survey of 24,831 U.S. elderly adults, the investigators found that the prevalence of diabetes among adults with Parkinson's disease was higher compared with people without Parkinson's disease (13). In two case-control studies, the prevalence of diabetes among patients with Parkinson's disease was lower compared with the control group (14,15). A moderately reduced risk of Parkinson's disease was associated with diabetes among men but not women in one case-

control study (14). In another case-control study, diabetes was significantly associated with a reduced risk of Parkinson's disease in the univariate analysis but not in the multivariate analysis (15). Several reasons for the inconsistency of these two case-control studies with our study can be considered. First, potential recall bias, in the case of Parkinson's disease, could be substantial because patients often experience cognitive decline and tend to gradually change their lifestyles before the diagnoses. It has been shown that patients with Parkinson's disease often will develop dementia, but in their article (14,15), all patients with Parkinson's disease were newly diagnosed and the authors did not report any cases of dementia among patients with Parkinson's disease. In the present study, we also have no information about the dementia and Alzheimer's disease. Second, the risk effect of diabetes on Parkinson's disease could be diminished in a case-control study due to survival bias associated with high mortality among diabetic patients. Third, the authors did not differentiate between type 1 and type 2 diabetes in one case-control study (14). Fourth, there is a possibility for a reverse causality, i.e., that the development of Parkinson's disease may influence risk factors for diabetes as seen to happen for other chronic diseases such as Alzheimer's disease (32,33). Finally, they did not measure some important factors associated with both type 2 diabetes and Parkinson's disease, such as coffee and alcohol consumption, BMI, serum lipids, and physical activity (14,15).

Even though the mechanism of the association between history of type 2 diabetes and the risk of Parkinson's disease is poorly understood, several putative mechanisms can be proposed. Animal and in vitro studies have shown a role for

insulin in the regulation of brain dopaminergic activity. Insulin and dopamine may exert reciprocal regulation (16). Recently, insulin dysregulation and changes in insulin action have been of concern in the pathophysiology and clinical symptoms of Parkinson's disease (16).

Several lifestyle factors are associated with the risk of both type 2 diabetes and Parkinson's disease. Cigarette smoking increases the risk of type 2 diabetes, whereas some studies have suggested an inverse association between cigarette smoking and the risk of Parkinson's disease (34). Coffee drinking (caffeine) is known to reduce the risk of Parkinson's disease (34). Although no association between total alcohol intake and the risk of Parkinson's disease has been found in the Health Professionals Follow-Up Study and the Nurses' Health Study, the combined analysis of these two studies found that beer drinkers had a 30% lower incidence of Parkinson's disease than non-beer drinkers (35). A significantly inverse association between leisure-time physical activity and the risk of Parkinson's disease has been found among men in the Health Professionals Follow-Up Study but not among women in the Nurses' Health Study (36). In the present study, Finnish men and women with the history of type 2 diabetes were less often alcohol drinkers, less often smokers, and were less active than people without diabetes. However, there were no differences in coffee consumption between Finnish subjects with and without type 2 diabetes. In our study, we took into account the possible effect of all lifestyle factors by adjusting for baseline habits of tea consumption, coffee and alcohol consumption, smoking, and leisure-time physical activity in the data analyses.

It could also be hypothesized that di-



abetes might increase the risk of Parkinson's disease partly through excess body weight. A statistically significant direct association between triceps skinfold thickness and the risk of Parkinson's disease has been found in the Honolulu Heart Program including 7,990 Japanese-American men in Hawaii (37). We have demonstrated that excess weight, defined as a BMI of  $\geq 23 \text{ kg/m}^2$ , is associated with an elevated risk of Parkinson's disease in the same study population (21). In the present study, Finnish men and women with a history of type 2 diabetes had a significantly higher baseline BMI than individuals without diabetes. However, we found that the association between the history of type 2 diabetes and the risk of Parkinson's disease was independent of baseline BMI. The relative risk of Parkinson's disease was the lowest among the baseline oldest subjects, in whom the prevalence of Parkinson's disease is the highest. Does the risk of Parkinson's disease depend on the length of exposure to diabetes? One explanation could be that lifestyle or other possible factors such as insulin dysregulation may need a longer period to show their effects on the dopaminergic system.

There are several strengths and limitations of our study. The study was population based and was based on a large number of men and women from a homogeneous population. The mean follow-up (18.0 years) was long. The sample included the largest number of patients with Parkinson's disease reported in any prospective study to date; thus, statistical power in our study was high. Cerebrovascular disorders, coronary heart disease, and certain drugs are among the important causes of secondary Parkinsonism and vascular Parkinsonism (38–40). Exclusion of subjects with stroke or coronary heart disease or those who used neuroleptic drugs did not attenuate the association between type 2 diabetes and the Parkinson's disease risk. The main limitations of our study included, first, the absence of information in surveillance of diabetic patients from nondiabetic patients during the follow-up. Second, because we did not carry out either fasting glucose measurement or a glucose tolerance test at the baseline, we may have missed some cases of asymptomatic or diet-treated diabetes. Third, we did not have data on the severity and duration of diabetes, glucose control, and the type of drugs used for the treatment of diabetes. Fourth, because our data allowed for only

a dichotomized measure of alcohol consumption in our sample, we may not have been able to control fully for the effect of this variable on the risk of Parkinson's disease. Fifth, patients with type 2 diabetes are more prone to other diseases and are therefore likely to be in contact with the health care system more often than people without diabetes. Increased surveillance of patients with diabetes for other medical conditions, including neurological disorders such as Parkinson's disease, could also have contributed to higher rates than among patients without diabetes, who tend to be under less intense long-term medical scrutiny. This could result in ascertainment bias. However, we think this is less likely in Parkinson's disease, because Parkinson's disease symptoms are clearly defined and are likely to bring a subject to the attention of the medical system. It could also be the case that diabetes-associated comorbidities exacerbate Parkinson's disease symptoms, so that diabetic patients with Parkinson's disease are more likely to reach the threshold at which they qualify for special reimbursement of drugs and thus be included in our sample. Sixth, we cannot completely exclude either the effects of residual confounding due to measurement error in the assessment of confounding factors or some unmeasured factors. Finally, we can exclude neither a shared environmental nor a genetic background of diabetes and the risk of Parkinson's disease.

In conclusion, our study demonstrated that type 2 diabetes was associated with an elevated risk of Parkinson's disease among men and women independently of other potential confounding factors. The biological mechanisms behind the association of type 2 diabetes with the risk of Parkinson's disease are, however, not understood at present. Further studies to replicate our findings in other populations should be acknowledged.

**Acknowledgments**—This study was supported by the Finnish Academy (grants 46558, 204274, 205657, and 108297), the Finnish Parkinson Foundation, and Special Research Funds of the Social Welfare and Health Board, City of Oulu.

## References

1. Wild S, Roglic G, Green A, Sicree R, King H: Global prevalence of diabetes: estimates for the year 2000 and projections for 2030. *Diabetes Care* 27:1047–1053, 2004

2. Hu G, DECODE Study Group: Gender difference in all-cause and cardiovascular mortality related to hyperglycaemia and newly-diagnosed diabetes. *Diabetologia* 46:608–617, 2003
3. Hu G, Jousilahti P, Qiao Q, Katoh S, Tuomilehto J: Sex differences in cardiovascular and total mortality among diabetic and non-diabetic individuals with or without history of myocardial infarction. *Diabetologia* 48:856–861, 2005
4. Boulton AJ, Vinik AI, Arezzo JC, Bril V, Feldman EL, Freeman R, Malik RA, Maser RE, Soslenko JM, Ziegler D: Diabetic neuropathies: a statement by the American Diabetes Association. *Diabetes Care* 28:956–962, 2005
5. Tuomilehto J, Rastenyte D, Jousilahti P, Sarti C, Vartiainen E: Diabetes mellitus as a risk factor for death from stroke: prospective study of the middle-aged Finnish population. *Stroke* 27:210–215, 1996
6. Lawes CM, Parag V, Bennett DA, Suh I, Lam TH, Whitlock G, Barzi F, Woodward M: Blood glucose and risk of cardiovascular disease in the Asia Pacific region. *Diabetes Care* 27:2836–2842, 2004
7. Hu G, Sarti C, Jousilahti P, Peltonen M, Qiao Q, Antikainen R, Tuomilehto J: The impact of history of hypertension and type 2 diabetes at baseline on the incidence of stroke and stroke mortality. *Stroke* 36:2538–2543, 2005
8. Hu G, Jousilahti P, Sarti C, Antikainen R, Tuomilehto J: The effect of diabetes and stroke at baseline and during follow-up on stroke mortality. *Diabetologia* 49:2309–2316, 2006
9. Leibson CL, Rocca WA, Hanson VA, Cha R, Kokmen E, O'Brien PC, Palumbo PJ: Risk of dementia among persons with diabetes mellitus: a population-based cohort study. *Am J Epidemiol* 145:301–308, 1997
10. Ott A, Stolk RP, van Harskamp F, Pols HA, Hofman A, Breteler MM: Diabetes mellitus and the risk of dementia: the Rotterdam Study. *Neurology* 53:1937–1942, 1999
11. Peila R, Rodriguez BL, Launer LJ: Type 2 diabetes, APOE gene, and the risk for dementia and related pathologies: the Honolulu-Asia Aging Study. *Diabetes* 51:1256–1262, 2002
12. Sandyk R: The relationship between diabetes mellitus and Parkinson's disease. *Int J Neurosci* 69:125–130, 1993
13. Pressley JC, Louis ED, Tang MX, Cote L, Cohen PD, Glied S, Mayeux R: The impact of comorbid disease and injuries on resource use and expenditures in parkinsonism. *Neurology* 60:87–93, 2003
14. Powers KM, Smith-Weller T, Franklin GM, Longstreth WT Jr, Swanson PD, Checkoway H: Diabetes, smoking, and other medical conditions in relation to Parkinson's disease risk. *Parkinsonism Relat Disord* 12:185–189, 2006

15. Scigliano G, Musicco M, Soliveri P, Piccolo I, Ronchetti G, Girotti F: Reduced risk factors for vascular disorders in Parkinson disease patients: a case-control study. *Stroke* 37:1184–1188, 2006
16. Craft S, Watson GS: Insulin and neurodegenerative disease: shared and specific mechanisms. *Lancet Neurol* 3:169–178, 2004
17. Vartiainen E, Jousilahti P, Alftan G, Sundvall J, Pietinen P, Puska P: Cardiovascular risk factor changes in Finland, 1972–1997. *Int J Epidemiol* 29:49–56, 2000
18. Pajak A, Kuulasmaa K, Tuomilehto J, Ruokokoski E: Geographical variation in the major risk factors of coronary heart disease in men and women aged 35–64 years: The WHO MONICA Project. *World Health Stat Q* 41:115–140, 1988
19. World Health Organization: *Diabetes Mellitus: Report of a WHO Study Group*. Geneva, World Health Org., 1985 (Tech. Rep. Ser., no. 727)
20. WHO Consultation: *Definition, Diagnosis and Classification of Diabetes Mellitus and Its Complications. Part 1: Diagnosis and Classification of Diabetes Mellitus*. Geneva, World Health Organization, 1999
21. Hu G, Jousilahti P, Nissinen A, Antikainen RL, Kivipelto M, Tuomilehto J: Body mass index and the risk of Parkinson disease. *Neurology* 67:1955–1959, 2006
22. Hu G, Qiao Q, Silventoinen K, Eriksson JG, Jousilahti P, Lindstrom J, Valle TT, Nissinen A, Tuomilehto J: Occupational, commuting, and leisure-time physical activity in relation to risk for type 2 diabetes in middle-aged Finnish men and women. *Diabetologia* 46:322–329, 2003
23. Hu G, Barengo NC, Tuomilehto J, Lakka TA, Nissinen A, Jousilahti P: Relationship of physical activity and body mass index to the risk of hypertension: a prospective study in Finland. *Hypertension* 43:25–30, 2004
24. Hu G, Eriksson J, Barengo NC, Lakka TA, Valle TT, Nissinen A, Jousilahti P, Tuomilehto J: Occupational, commuting, and leisure-time physical activity in relation to total and cardiovascular mortality among Finnish subjects with type 2 diabetes. *Circulation* 110:666–673, 2004
25. Hu G, Lindstrom J, Valle TT, Eriksson JG, Jousilahti P, Silventoinen K, Qiao Q, Tuomilehto J: Physical activity, body mass index, and risk of type 2 diabetes in patients with normal or impaired glucose regulation. *Arch Intern Med* 164:892–896, 2004
26. Hu G, Tuomilehto J, Silventoinen K, Barengo N, Jousilahti P: Joint effects of physical activity, body mass index, waist circumference and waist-to-hip ratio with the risk of cardiovascular disease among middle-aged Finnish men and women. *Eur Heart J* 25:2212–2219, 2004
27. Hu G, Sarti C, Jousilahti P, Silventoinen K, Barengo NC, Tuomilehto J: Leisure time, occupational, and commuting physical activity and the risk of stroke. *Stroke* 36:1994–1999, 2005
28. Hu G, Jousilahti P, Barengo NC, Qiao Q, Lakka TA, Tuomilehto J: Physical activity, cardiovascular risk factors, and mortality among Finnish adults with diabetes. *Diabetes Care* 28:799–805, 2005
29. Hu G, Jousilahti P, Peltonen M, Bidel S, Tuomilehto J: Joint association of coffee consumption and other factors to the risk of type 2 diabetes: a prospective study in Finland. *Int J Obes (Lond)* 30:1742–1749, 2006
30. Tuomilehto J, Hu G, Bidel S, Lindstrom J, Jousilahti P: Coffee consumption and risk of type 2 diabetes mellitus among middle-aged Finnish men and women. *JAMA* 291:1213–1219, 2004
31. Arvanitakis Z, Wilson RS, Schneider JA, Bienias JL, Evans DA, Bennett DA: Diabetes mellitus and progression of rigidity and gait disturbance in older persons. *Neurology* 63:996–1001, 2004
32. Skoog I, Lernfelt B, Landahl S, Palmertz B, Andreasson LA, Nilsson L, Persson G, Oden A, Svanborg A: 15-year longitudinal study of blood pressure and dementia. *Lancet* 347:1141–1145, 1996
33. Notkola IL, Sulkava R, Pekkanen J, Erkinjuntti T, Ehnholm C, Kivinen P, Tuomilehto J, Nissinen A: Serum total cholesterol, apolipoprotein E epsilon 4 allele, and Alzheimer's disease. *Neuroepidemiology* 17:14–20, 1998
34. Hernan MA, Takkouche B, Caamano-Isorna F, Gestal-Otero JJ: A meta-analysis of coffee drinking, cigarette smoking, and the risk of Parkinson's disease. *Ann Neurol* 52:276–284, 2002
35. Hernan MA, Chen H, Schwarzschild MA, Ascherio A: Alcohol consumption and the incidence of Parkinson's disease. *Ann Neurol* 54:170–175, 2003
36. Chen H, Zhang SM, Schwarzschild MA, Hernan MA, Ascherio A: Physical activity and the risk of Parkinson disease. *Neurology* 64:664–669, 2005
37. Abbott RD, Ross GW, White LR, Nelson JS, Masaki KH, Tanner CM, Curb JD, Blanchette PL, Popper JS, Petrovitch H: Midlife adiposity and the future risk of Parkinson's disease. *Neurology* 59:1051–1057, 2002
38. Rampello L, Alvano A, Battaglia G, Raffaele R, Vecchio I, Malaguarnera M: Different clinical and evolutionary patterns in late idiopathic and vascular parkinsonism. *J Neurol* 252:1045–1049, 2005
39. Thanvi B, Lo N, Robinson T: Vascular parkinsonism: an important cause of parkinsonism in older people. *Age Ageing* 34:114–119, 2005
40. Rektor I, Rektorova I, Kubova D: Vascular parkinsonism: an update. *J Neurol Sci* 185–191, 2006
